# Supplementary material for: Reproducibility of a combined artificial intelligence and optimal-surface graph-cut method to automate bronchial parameter extraction
Source: Springer Nature journal article supplement (doi:10.1007/s00330-023-09615-y), 2023-04-18
Supplement: MOESM1 [file 25255134]

## ELECTRONIC SUPPLEMENTARY MATERIAL

### Reproducibility of a Combined Artificial Intelligence and Optimal-Surface Graph-Cut Method to Automate Bronchial Parameter Extraction

Supplementary Table S1

| Tube | Real WT (mm) | FWHM WT (mm) | Error (mm) | Error (%) |
|------|--------------|--------------|------------|-----------|
| 1    | 0.4          | 0.94±0.37    | +0.54      | +135      |
| 2    | 1.2          | 1.32±0.19    | +0.12      | +10       |
| 3    | 1.2          | 1.45±0.17    | +0.25      | +21       |
| 4    | 0.4          | 1.02±0.16    | +0.62      | +155      |
| 5    | 0.9          | 1.22±0.03    | +0.32      | +36       |
| 6    | 0.6          | 1.15±0.0     | +0.55      | +92       |
| 7    | 0.6          | 1.17±0.03    | +0.57      | +95       |
| 8    | 1.5          | 1.62±0.06    | +0.12      | +8        |

Wall thickness (WT) measurement on the COPDGene phantom using the Full-Width Half-Maximum (FWHM) method, in comparison to the real dimensions of the phantom airways. FWHM ± Standard Deviation (SD).

Supplementary Figure S1

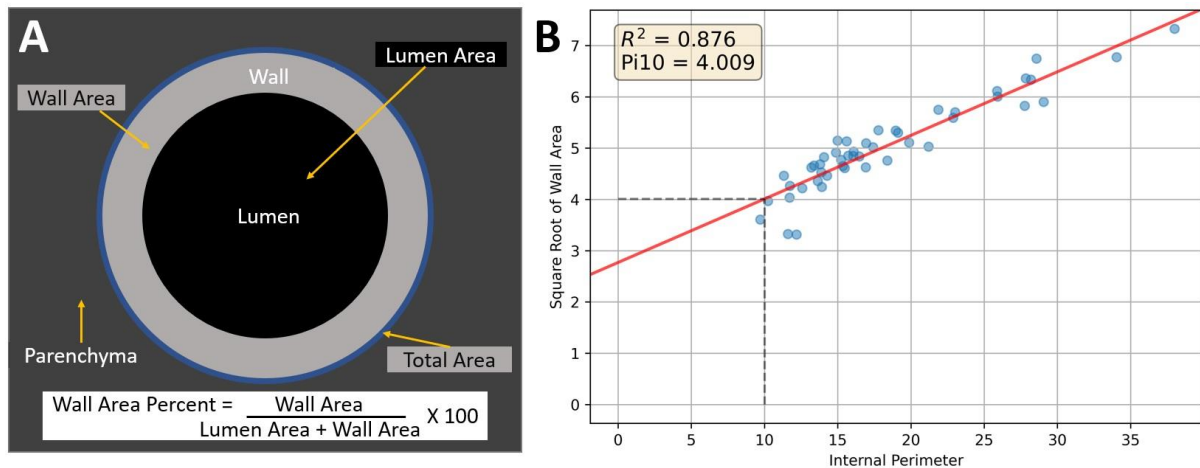

(A) Diagram illustrating the cross-section of an airway, from which bronchial parameters can be calculated. Luminal Area (LA) is calculated using the average lumen radius. The Total Area (TA) uses the average outer wall radius. Wall Area (WA) is calculated by subtracting the LA from TA. Wall Area Percent is calculated by dividing WA by TA and multiplying by 100.

(B) Example graph of Square Root of the Wall Area vs internal perimeter in mm for the purpose of calculating Pi10. Each data point is a single branch from the airway tree. Only branches up to 6<sup>th</sup> generation were included for Pi10 calculation.
